# Supplementary material for: Association of microRNA-34a rs2666433 (A/G) Variant with Systemic Lupus Erythematosus in Female Patients: A Case-Control Study
Source: MDPI journal article supplement (doi:10.3390/jcm10215095), 2021-10-30
Supplement: s1 [file s1]

**Table S1.** Gene targets for microRNA-34a-5p in the SLE KEGG pathway (hsa05322) and their structural and functional role in the cell

| Gene target in SLE KEGG pathway       | Gene symbol | Structural component                                                             | Function                                                                                                                                                  |
|---------------------------------------|-------------|----------------------------------------------------------------------------------|-----------------------------------------------------------------------------------------------------------------------------------------------------------|
| <b>Histone variants</b>               |             | The core component of the nucleosome which wraps and compacts DNA into chromatin | limiting DNA accessibility to the cellular machinery, thereby play a central role in transcription regulation, DNA replication, and chromosomal stability |
| Histone H2A type 1-C                  | HIST1H2AC   |                                                                                  |                                                                                                                                                           |
| Histone H2A type 1-D                  | HIST1H2AD   |                                                                                  |                                                                                                                                                           |
| Histone H2A type 2-A                  | HIST2H2AA3  |                                                                                  |                                                                                                                                                           |
| Histone H2AX                          | H2AFX       |                                                                                  |                                                                                                                                                           |
| Histone H2A.V                         | H2AFV       |                                                                                  |                                                                                                                                                           |
| Histone H2B type 1-D                  | IST1H2BD    |                                                                                  |                                                                                                                                                           |
| Histone H2B type 1-J                  | HIST1H2BJ   |                                                                                  |                                                                                                                                                           |
| Histone H2B type 1-M                  | HIST1H2BM   |                                                                                  |                                                                                                                                                           |
| Histone H2B type 1-O                  | HIST1H2BO   |                                                                                  |                                                                                                                                                           |
| Histone H2B type 2-E                  | HIST2H2BE   |                                                                                  |                                                                                                                                                           |
| Histone H2B type 3-B                  | HIST3H2BB   |                                                                                  |                                                                                                                                                           |
| H3 histone, family 3B                 | H3F3B       |                                                                                  |                                                                                                                                                           |
| Histone H4                            | HIST1H4E    |                                                                                  |                                                                                                                                                           |
| Histone cluster 1 H2B family member c | HIST1H2BC   |                                                                                  |                                                                                                                                                           |
| Histone cluster 1 H3 family member j  | HIST1H3J    |                                                                                  |                                                                                                                                                           |
| Histone cluster 1 H4 family member a  | HIST1H4A    |                                                                                  |                                                                                                                                                           |
| Histone cluster 1 H4 family member b  | HIST1H4B    |                                                                                  |                                                                                                                                                           |
| Histone cluster 1 H4 family member d  | HIST1H4D    |                                                                                  |                                                                                                                                                           |
| Histone cluster 1 H4 family member j  | HIST1H4J    |                                                                                  |                                                                                                                                                           |
| Histone cluster 1 H4 family member k  | HIST1H4K    |                                                                                  |                                                                                                                                                           |
| <b>RNA-binding proteins</b>           |             | The core component of the spliceosomal U1, U2, U4, and U5 small nuclear          | The building blocks of the spliceosome involved in the splicing of cellular pre-mRNAs                                                                     |
| Small nuclear ribonucleoprotein Sm D3 | SNRPD3      |                                                                                  |                                                                                                                                                           |

|                                                         |                |                                                                                                                                                |                                                                                                                                                                                                                                |
|---------------------------------------------------------|----------------|------------------------------------------------------------------------------------------------------------------------------------------------|--------------------------------------------------------------------------------------------------------------------------------------------------------------------------------------------------------------------------------|
|                                                         |                | ribonucleoproteins (snRNPs)                                                                                                                    |                                                                                                                                                                                                                                |
| Ro60, Y RNA Binding Protein                             | RO60 or TROVE2 | RNA-binding protein                                                                                                                            | Binds to misfolded non-coding RNAs, pre-5S rRNA, and several small cytoplasmic RNA molecules known as Y RNAs                                                                                                                   |
| E3 ubiquitin-protein ligase TRIM21                      | TRIM21         | Forms a ubiquitin ligase complex in cooperation with the E2 UBE2D2 enzymes                                                                     | mediate ubiquitination of USP4, IKBKB, and CDKN1B                                                                                                                                                                              |
| <b>Immune response</b>                                  |                |                                                                                                                                                |                                                                                                                                                                                                                                |
| T-lymphocyte activation antigen CD86                    | CD86           | Receptor involved in the costimulatory signal essential for T-lymphocyte proliferation and interleukin-2 production, by binding CD28 or CTLA-4 | May play a critical role in the early events of T-cell activation and co-stimulation of naive T-cells, such as deciding between immunity and anergy that is made by T- cells within 24 hours after activation                  |
| Tumor necrosis factor receptor superfamily member 5     | CD40           | Receptor for TNFSF5/CD40LG                                                                                                                     | Transduces TRAF6- and MAP3K8-mediated signals that activate ERK in macrophages and B cells, leading to induction of immunoglobulin secretion                                                                                   |
| HLA class II histocompatibility antigen, DM alpha chain | HLA-DMA        | MHC class II                                                                                                                                   | Plays a critical role in catalyzing the release of class II-associated invariant chain peptide (CLIP) from newly synthesized MHC class II molecules and freeing the peptide binding site for acquisition of antigenic peptides |

---

**Table S2.** Impact and linkage disequilibrium of MIR34A rs2666433 variant with other SNPs ( $r^2 \geq 0.8$ ) predicted by HaploReg V4.1

| Chr | pos (hg38) | LD<br>( $r^2$ ) | LD<br>(D') | variant                 | Ref | Alt | Proteins<br>bound | Motifs<br>changed       | GENCODE<br>genes   |
|-----|------------|-----------------|------------|-------------------------|-----|-----|-------------------|-------------------------|--------------------|
| 1   | 9142702    | 0.86            | -0.96      | rs34196792              | G   | A   | ZNF 263           | BDP1, LUN-1             | 9kb 3' of MIR34A   |
| 1   | 9147585    | 0.89            | -0.98      | rs113390912             | C   | T   |                   | 5 altered motifs        | 4.1kb 3' of MIR34A |
| 1   | 9153118    | 1               | 1          | <b><u>rs2666433</u></b> | A   | G   |                   | <b>Ets, PPAR, Pax-4</b> | 1.3kb 5' of MIR34A |
| 1   | 9154958    | 0.8             | -0.92      | rs34174278              | A   | G   |                   | TATA                    | 3.2kb 5' of MIR34A |
| 1   | 9157629    | 0.8             | -0.92      | rs34619897              | C   | T   |                   |                         | 5.9kb 5' of MIR34A |

Chr: chromosome, pos: position, hg38: human genome release number 38, LD: linkage disequilibrium, Ref: reference allele, Alt: alternative allele. BDP1: B Double Prime 1, a subunit of RNA Polymerase III Transcription Initiation Factor IIIB, LUN-1: a ring finger protein highly expressed in the lung, Ets: "The ETS domain identifies all Ets proteins as sequence-specific DNA-binding proteins", PPAR: Peroxisome-proliferator activated receptor, PAX-4: paired box- 4, TATA: promoter sequences specify the start of the transcription process.

Data source: HaploReg v 4.1. (<https://pubs.broadinstitute.org/mammals/haploreg/haploreg.php>) (last accessed 27 May 2021).
